# Supplementary material
Source: PubMed Central journal article supplement (PMC2323131)
Supplement: hesr0043-0344-sm-Appendix-Tables.pdf [file hesr0043-0344-sm-Appendix-Tables.pdf]

Appendix Table 1. Determinants of the probability of lacking help with ADLs using spending quartiles

|                                        | Weighted means | Model                  |                 |
|----------------------------------------|----------------|------------------------|-----------------|
|                                        |                | Estimated coefficients | Standard errors |
| Medicaid per capita home care spending |                |                        |                 |
| Top quartile                           | .250           | 0.0332                 | (0.0395)        |
| 2 <sup>nd</sup> quartile               | .192           | 0.0004                 | (0.0448)        |
| 3 <sup>rd</sup> quartile               | .278           | 0.0536                 | (0.0352)        |
| Income                                 |                |                        |                 |
| <150% SSI                              | .330           | 0.0013                 | (0.0345)        |
| 150-300% SSI                           | .411           | -0.0003                | (0.0309)        |
| Income <150% SSI interacted with:      |                |                        |                 |
| Top quartile                           | .070           | -0.1468***             | (0.0489)        |
| 2 <sup>nd</sup> quartile               | .058           | -0.0283                | (0.0564)        |
| 3 <sup>rd</sup> quartile               | .098           | -0.0648                | (0.0454)        |
| Income 150-300% SSI interacted with:   |                |                        |                 |
| Top quartile                           | .105           | -0.0358                | (0.0437)        |
| 2 <sup>nd</sup> quartile               | .083           | -0.0249                | (0.0484)        |
| 3 <sup>rd</sup> quartile               | .112           | -0.0390                | (0.0401)        |
| Age groups                             |                |                        |                 |
| 75-84                                  | .418           | -0.1047***             | (0.0171)        |
| 85 and over                            | .227           | -0.2239***             | (0.0173)        |
| Number of ADL limitations              |                |                        |                 |
| Two                                    | .209           | -0.0444**              | (0.0198)        |
| Three                                  | .146           | -0.0279                | (0.0211)        |
| Four                                   | .132           | -0.1379***             | (0.0230)        |
| Five                                   | .079           | -0.2036***             | (0.0242)        |
| Female                                 | .666           | -0.0359**              | (0.0151)        |
| Black                                  | .110           | -0.0445**              | (0.0217)        |
| Metropolitan area                      | .725           | 0.0367                 | (0.0234)        |
| Number of children                     | 2.80           | 0.0013                 | (0.0028)        |
| Living arrangement                     |                |                        |                 |
| Alone                                  | .352           | 0.1564***              | (0.0172)        |
| With child                             | .165           | -0.0023                | (0.0210)        |
| With other persons                     | .080           | 0.0051                 | (0.0286)        |
| Constant                               | --             | 0.5391***              | (0.0399)        |

Note: The model is estimated using a linear probability model.

\*\*\* p<.01; \*\*p<.05; \*p<.10

Appendix Table 2. Determinants of the probability of lacking help with ADLs using logarithm of per capita spending

|                                | Without<br>Fixed Effects | With<br>Fixed Effects  |
|--------------------------------|--------------------------|------------------------|
| Ln (spending)                  | -0.0028<br>(0.0116)      | 0.0122<br>(0.0154)     |
| Income                         |                          |                        |
| <150% SSI                      | 0.1550<br>(0.1049)       | 0.1513<br>(0.1132)     |
| 150-300% SSI                   | 0.0396<br>(0.1241)       | 0.0557<br>(0.1095)     |
| Ln (spending) interacted with: |                          |                        |
| <150% SSI                      | -0.0283*<br>(0.0149)     | -0.0279*<br>(0.0158)   |
| 150-300% SSI                   | -0.0082<br>(0.0173)      | -0.0104<br>(0.0152)    |
| Age groups                     |                          |                        |
| 75-to 84 years old             | -0.1125***<br>(0.0202)   | -0.1108***<br>(0.0153) |
| 85+ years old                  | -0.2258***<br>(0.0193)   | -0.2225***<br>(0.0170) |
| Number of ADL limitations      |                          |                        |
| Two                            | -0.0443**<br>(0.0201)    | -0.0430***<br>(0.0164) |
| Three                          | -0.0319*<br>(0.0177)     | -0.0352*<br>(0.0184)   |
| Four                           | -0.1295***<br>(0.0198)   | -0.1326***<br>(0.0191) |
| Five                           | -0.1916***<br>(0.0224)   | -0.1972***<br>(0.0232) |
| Female                         | -0.0289*<br>(0.0144)     | -0.0293**<br>(0.0141)  |
| Black                          | -0.0412*<br>(0.0213)     | -0.0445<br>(0.0202)    |
| Metropolitan area              | 0.0232<br>(0.0225)       | 0.066***<br>(0.0185)   |
| Number of children             | 0.0009<br>(0.0026)       | 0.0008<br>(0.0028)     |
| Living arrangement             |                          |                        |
| Alone                          | 0.1512***<br>(0.0179)    | 0.1514***<br>(0.0158)  |
| With a child                   | -0.0131<br>(0.0201)      | -0.0130<br>(0.0194)    |
| With other persons             | -0.0128<br>(0.0253)      | -0.0112<br>(0.0247)    |
| Constant                       | 0.5856***<br>(0.0923)    | 0.4496***<br>(0.1124)  |

\*\*\* p<.01; \*\*p<.05; \*p<.10. Standard errors are in parentheses.
